# Supplementary material for: Enterohemorrhagic Escherichia coli senses low biotin status in the large intestine for colonization and infection
Source: PubMed Central journal article supplement (PMC4382993; doi:10.1038/ncomms7592), 2015-03-20
Supplement: ncomms7592-s1.pdf [file ncomms7592-s1.pdf]

## Supplementary figures

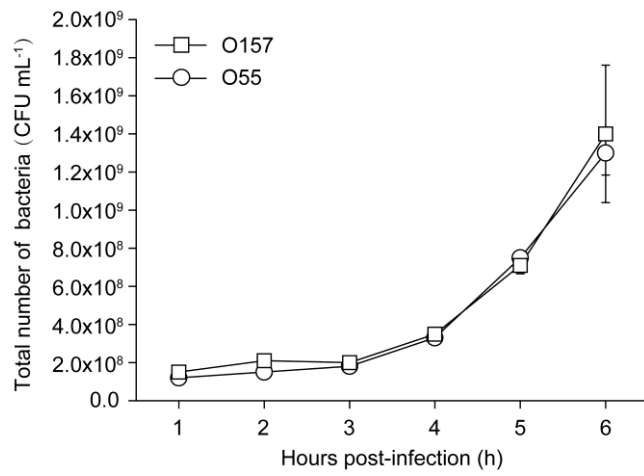

**Supplementary Figure 1.** The total numbers of attached and non-attached bacteria after 1 h to 6 h incubation of O157 or O55 with HeLa epithelial cells. Data are presented as means  $\pm$  s.d.; n=3.

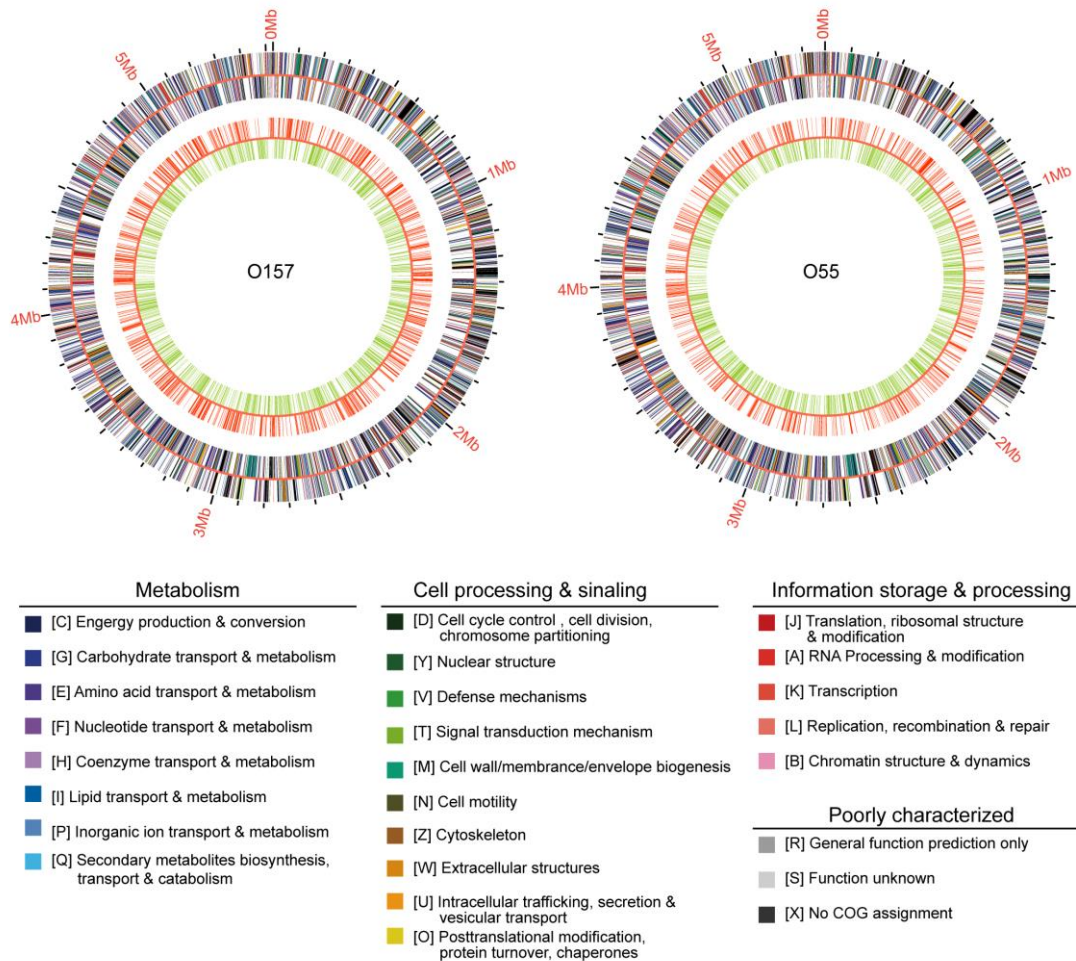

**Supplementary Figure 2.** Distribution of differentially expressed genes in the O157 and O55 genomes. From the outside in, circle 1 demonstrates the size in base pairs. Circles 2 and 3 indicate the CDSs in the clockwise and anti-clockwise directions, analyzed using the COG database (colors were assigned according the COG functional classes, see key). Circle 4 shows the position of the genes that are up-regulated 3 h after attachment of O157 or O55 to HeLa cells (colored orange). Circle 5 shows the position of genes that are down-regulated 3 h after attachment of O157 or O55 to HeLa cells (colored green).

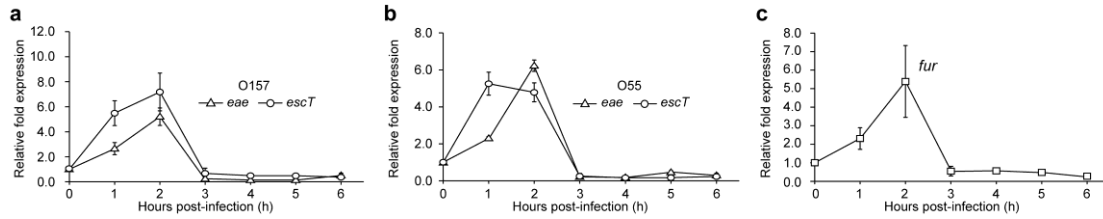

**Supplementary Figure 3.** (a) qRT-PCR quantification of the changes in expression of *eae* and *escT* in O157 incubated with HeLa cells from 1 to 6 h. (b) qRT-PCR quantification of the changes in the expression of *eae* and *escT* in O55 incubated with HeLa cells from 1 to 6 h. (c) qRT-PCR quantification of the changes in the expression of *fur* in O157 incubated with HeLa cells from 1 to 6 h. The expression of *eae*, *escT*, and *fur* in DMEM-grown O157 or O55 is represented as 1 (0 h), and all other values of expression from 1 h to 6 h are expressed relative to this value. Data are presented as means  $\pm$  s.d.; n=3.

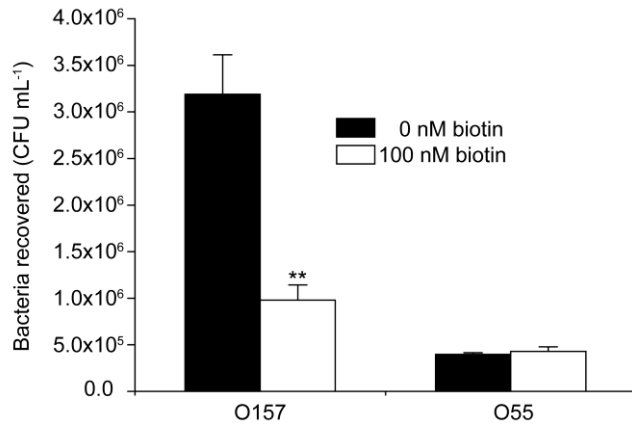

**Supplementary Figure 4.** Adherence of O157 and O55 to Caco-2 cells in the presence of 0 or 100 nM biotin. Caco-2 cells were grown to confluence in 6-well plates. Cell cultures were infected with exponential-phase O157 or O55 ( $10^8$  bacteria/well) for 3 h at 37 °C in a 5% CO<sub>2</sub> atmosphere. The attachment efficiency was represented by the colony-forming units (CFU) per milliliter. Data are presented as means  $\pm$  s.d.; n=3. \*\*  $P \leq 0.01$ . All  $P$  values were calculated using Student's  $t$ -test.

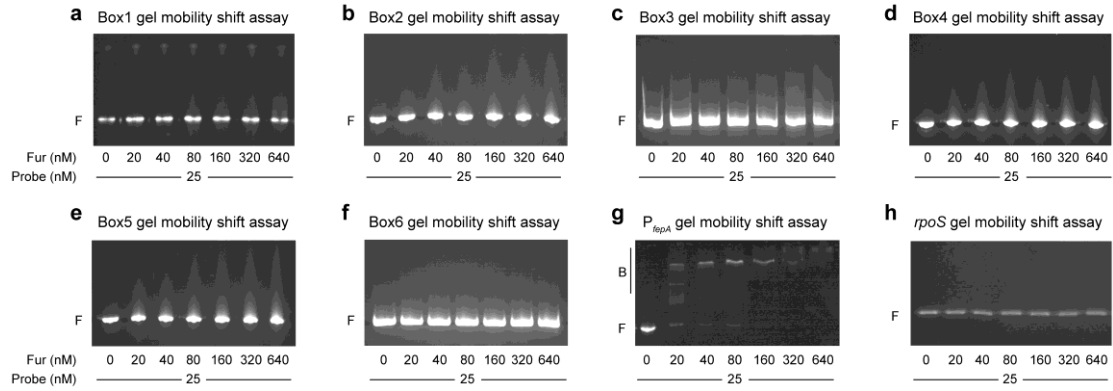

**Supplementary Figure 5. The interaction of Fur with the predicted Fur boxes located within the LEE region. (a-f)** Gel mobility shift analysis of Fur with the predicted Fur boxes (Box1 to Box6 in Supplementary Table 6) located within the O157 LEE region. **(g)** Gel mobility shift analysis of Fur with the *fepA* promoter region (positive control). The positions of the bound (denoted with “B”) and free (denoted with “F”) probe are shown on the left. **(h)** Gel mobility shift analysis of Fur with *rpoS* (negative control). For each assay, the concentrations of the probe and purified Fur are indicated at the bottom of each lane. Full gels are shown in Supplementary Figure 10.

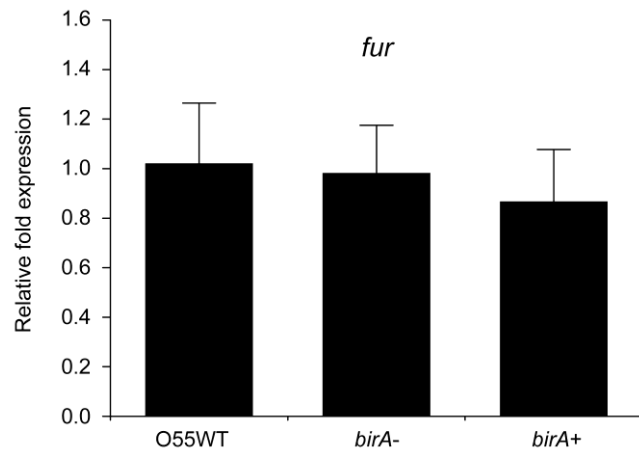

**Supplementary Figure 6.** Repetition of Figure 5d (O55). qRT-PCR quantification of the change in the expression of *fur* in the O55 wild-type strain and its *birA*-mutant and complemented strains. Data are presented as means  $\pm$  s.d.; n=3.

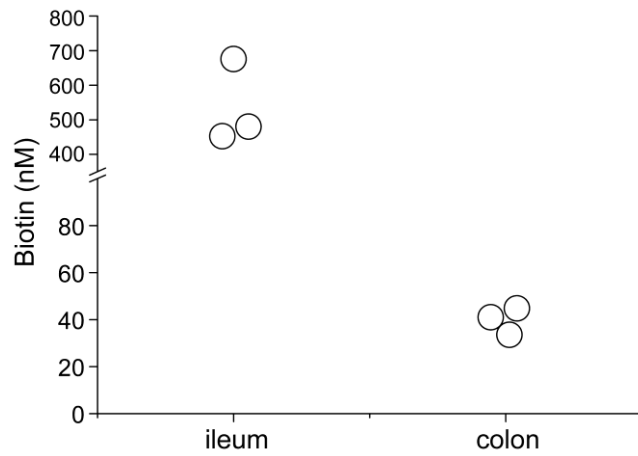

**Supplementary Figure 7.** Quantification of the molarity of biotin in the ileal content and colonic content obtained from mice fed a normal diet. The graph represents a typical experiment with 3 mice in each group.

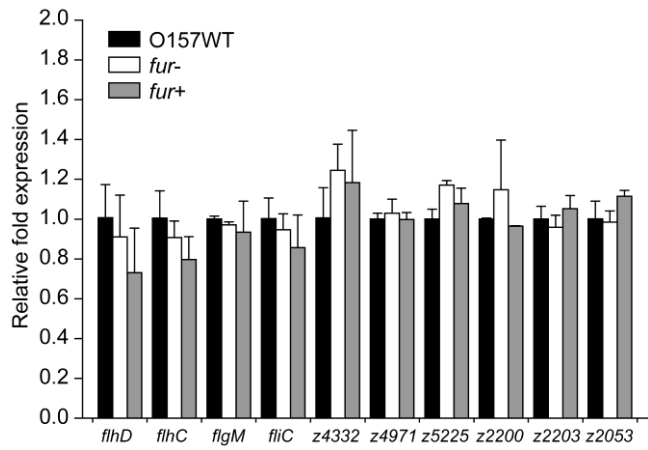

**Supplementary Figure 8.** qRT-PCR quantification of the changes in expression of *flhDC*, flagellum synthetic genes, and genes encoding initial adhesins in the O157 wild-type strain and its *fur*-mutant and complemented strains. Data are presented as means  $\pm$  s.d.; n=3.



Fig. 3h

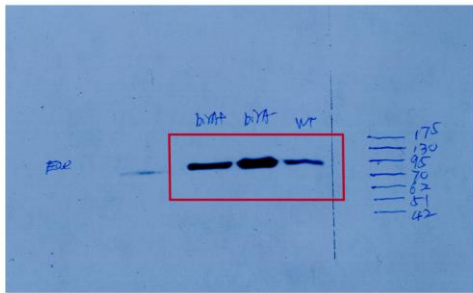

Fig. 3h

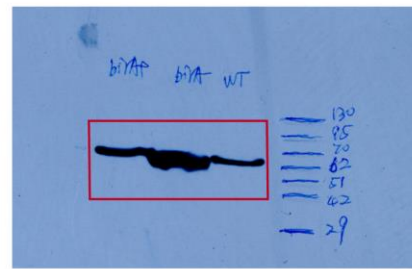

Fig. 5e

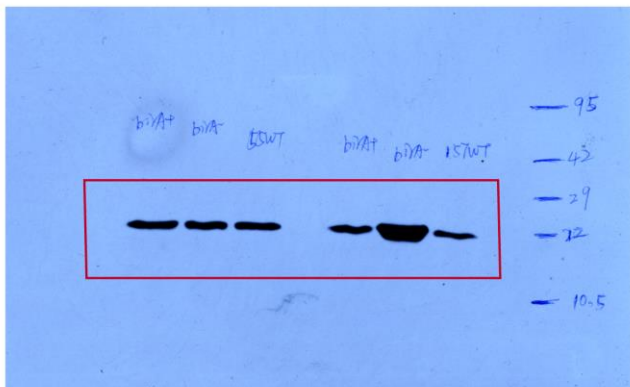

**Supplementary Figure 9.** Scans of the western blots. Boxes highlight lanes used in the figures.

Fig. 4a

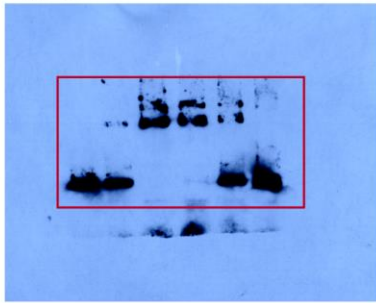

Fig. 4b

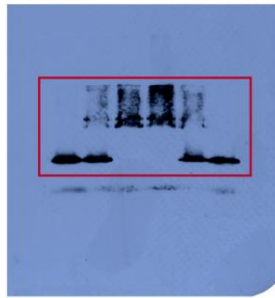

Fig. 4c

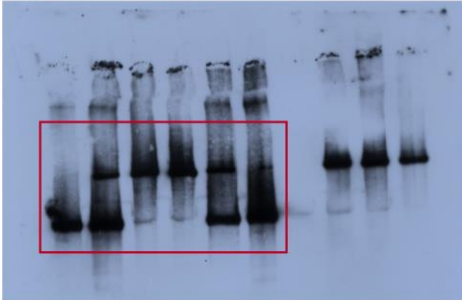

Fig. 4d

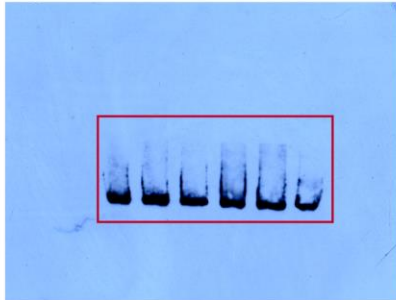

Supplementary Fig. 5a

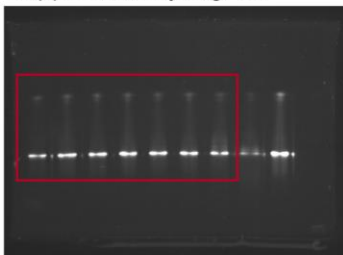

Supplementary Fig. 5b

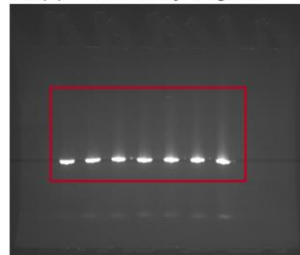

Supplementary Fig. 5c

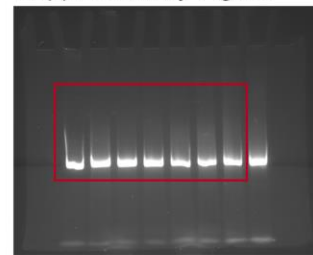

Supplementary Fig. 5d

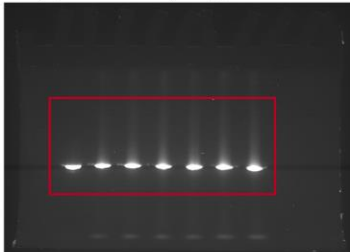

Supplementary Fig. 5e

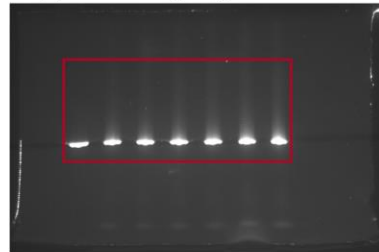

Supplementary Fig. 5f

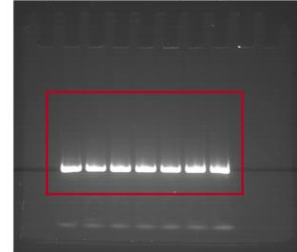

Supplementary Fig. 5g

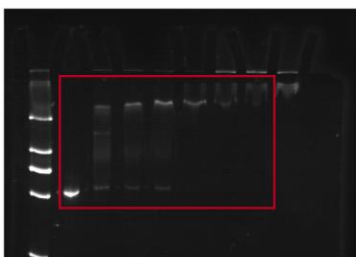

Supplementary Fig. 5h

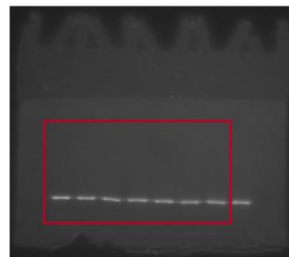

**Supplementary Figure 10.** Full blots and gels of the EMSAs. Boxes highlight lanes used in the figures.

## Supplementary Tables

**Supplementary Table 1. Statistics for the RNA-seq data sets**

|                                      | DMEM-grown<br>O157 | HeLa-attached<br>O157 | DMEM-grown<br>O55 | HeLa-attached<br>O55 |
|--------------------------------------|--------------------|-----------------------|-------------------|----------------------|
| Total number of reads                | 12,604,656         | 12,353,582            | 26,056,440        | 11,822,200           |
| Average read length (bp)             | 74.20              | 78.34                 | 74.56             | 76.13                |
| Low-quality reads                    | 1,186,530          | 1,126,642             | 2,530,852         | 1,222,395            |
| Multi-mapped reads                   | 336,973            | 773,344               | 136,363           | 68,528               |
| Reads mapped to bacterial genome     | 9,916,754          | 4,917,044             | 20,979,282        | 1,347,940            |
| Mapping success rate (%)             | 92.05              | 46.71                 | 94.34             | 13.70                |
| Reads mapped to host genome          | /                  | 5,084,499             | /                 | 7,979,625            |
| Contamination rate with host RNA (%) | /                  | 48.30                 | /                 | 81.10                |
| Gene coverage (%)                    | 94.66              | 87.92                 | 96.17             | 79.52                |

**Supplementary Table 2. Statistics for the ChIP-seq data sets**

|                                  | Mock-ChIP sample | BirA-ChIP sample |
|----------------------------------|------------------|------------------|
| Total number of reads            | 6,011,222        | 6,591,200        |
| Average read length (bp)         | 85.85            | 86.02            |
| Low-quality reads                | 723,554          | 923,893          |
| Multi-mapped reads               | 255,873          | 277,694          |
| Reads mapped to bacterial genome | 4,669,886        | 5,091,616        |
| Mapping success rate             | 92.30%           | 93.27%           |
| Coverage (fold)                  | 72.52            | 79.22            |

**Supplementary Table 3. The interaction of Fur with predicted Fur boxes located in the LEE region and the promoter regions of known LEE regulators in O157, as determined by ChIP-qPCR**

| Site_name         | Putative Fur box     | Start   | End     | Fold*       | Reference    |
|-------------------|----------------------|---------|---------|-------------|--------------|
| Box1 <sup>†</sup> | AATAATAAATATGTTTAT   | 4662881 | 4662898 | 0.93 ± 0.10 | This study   |
| Box2              | AATAAAAAATAATTATATT  | 4670769 | 4670786 | 0.94 ± 0.41 | This study   |
| Box3              | CATTATTATTTTCTATTAC  | 4673538 | 4673556 | 0.80 ± 0.19 | This study   |
| Box4              | CATAAAGATAATAATCAT   | 4680198 | 4680215 | 0.75 ± 0.13 | This study   |
| Box5              | TATTATAATTTTATTAT    | 4687072 | 4687088 | 0.94 ± 0.13 | This study   |
| Box6              | CATATTCATAATAAATAAT  | 4689132 | 4689150 | 1.17 ± 0.18 | This study   |
| P <sub>fepA</sub> | TATTATGATAACTATTTGCA | 694097  | 694117  | 6.68 ± 1.63 | <sup>1</sup> |
| <i>rpoS</i>       | none                 |         |         | 1.05 ± 0.17 | This study   |
| P <sub>hns</sub>  | none                 |         |         | 0.96 ± 0.25 | This study   |
| P <sub>fis</sub>  | none                 |         |         | 1.03 ± 0.19 | This study   |
| P <sub>ihfA</sub> | none                 |         |         | 0.84 ± 0.20 | This study   |
| P <sub>ihfB</sub> | none                 |         |         | 0.81 ± 0.18 | This study   |
| P <sub>grlR</sub> | none                 |         |         | 1.23 ± 0.22 | This study   |
| P <sub>grvA</sub> | none                 |         |         | 1.13 ± 0.42 | This study   |
| P <sub>qseA</sub> | none                 |         |         | 1.10 ± 0.57 | This study   |
| P <sub>hha</sub>  | none                 |         |         | 1.20 ± 0.31 | This study   |
| P <sub>gadE</sub> | none                 |         |         | 0.70± 0.16  | This study   |
| P <sub>hfq</sub>  | none                 |         |         | 0.71± 0.13  | This study   |
| P <sub>etrA</sub> | none                 |         |         | 0.63± 0.22  | This study   |
| P <sub>eivF</sub> | none                 |         |         | 0.79± 0.14  | This study   |
| P <sub>rpoS</sub> | none                 |         |         | 0.99± 0.23  | This study   |
| P <sub>rpoN</sub> | none                 |         |         | 0.86± 0.16  | This study   |

\* , Fold enrichment measured by ChIP-qPCR, and values shown are the means ± SD of three independent experiments. <sup>†</sup>, Using a bioinformatics method allowing no more than two mismatches compared with the standard Fur box (Fur binding sequences, N A T W A T N A T W A T N A T W A T; N= any nucleoside; W=A or T) <sup>2</sup>, six putative Fur boxes (Box1 to Box6) were predicted within the O157 LEE pathogenicity island.

**Supplementary Table 4. Strains and plasmids used in this study**

| Strains | Genotype or description                                    | Source or reference |
|---------|------------------------------------------------------------|---------------------|
| G2734   | Wild-type EHEC O157:H7 EDL933                              | ATCC*               |
| G2583   | Wild-type EPEC O55:H7 CB9615                               | BfR†                |
| H2164   | <i>birA</i> deletion mutant in G2734 (pLW1629)             | This work           |
| H2257   | <i>birA</i> deletion mutant in G2583 (pLW1629)             | This work           |
| H2165   | <i>fur</i> deletion mutant in G2734                        | This work           |
| H2258   | <i>fur</i> deletion mutant in G2583                        | This work           |
| H2259   | <i>birA</i> and <i>fur</i> double deletion mutant in G2734 | This work           |
| H2404   | <i>birA</i> and <i>fur</i> double deletion mutant in G2583 | This work           |
| H2400   | H2164 containing pLW1693                                   | This work           |
| H2401   | H2257 containing pLW1693                                   | This work           |
| H2205   | H2164 containing pLW1630                                   | This work           |
| H2204   | H2257 containing pLW1630                                   | This work           |
| H2402   | H2165 containing pLW1694                                   | This work           |
| H2403   | H2258 containing pLW1694                                   | This work           |
| H2212   | H2165 containing pLW1633                                   | This work           |
| H2211   | H2258 containing pLW1633                                   | This work           |
| H2206   | DH5 $\alpha$ containing pLW1631                            | This work           |
| H2207   | BL21 containing pLW1631                                    | This work           |
| H2213   | DH5 $\alpha$ containing pLW1634                            | This work           |
| H2214   | BL21 containing pLW1634                                    | This work           |
| H2261   | H2164 containing pLW1658                                   | This work           |
| H2262   | H2257 containing pLW1658                                   | This work           |
| H2264   | H2165 containing pLW1659                                   | This work           |
| H2265   | H2258 containing pLW1659                                   | This work           |
| H2405   | G2734, intimin tagged with His tag                         | This work           |
| H2406   | H2164, intimin tagged with His tag                         | This work           |
| H2407   | H2400, intimin tagged with His tag                         | This work           |
| H2408   | G2734, Tir tagged with His tag                             | This work           |
| H2409   | H2164, Tir tagged with His tag                             | This work           |
| H2410   | H2400, Tir tagged with His tag                             | This work           |
| H2411   | G2734, Fur tagged with 3 $\times$ FLAG tag                 | This work           |
| H2412   | H2164, Fur tagged with 3 $\times$ FLAG tag                 | This work           |
| H2413   | H2400, Fur tagged with 3 $\times$ FLAG tag                 | This work           |
| H2414   | G2583, Fur tagged with 3 $\times$ FLAG tag                 | This work           |
| H2415   | H2257, Fur tagged with 3 $\times$ FLAG tag                 | This work           |
| H2416   | H2401, Fur tagged with 3 $\times$ FLAG tag                 | This work           |
| G4937   | EHEC O157:H7 ( <i>eae+</i> , <i>stx1+</i> , <i>stx2+</i> ) | <sup>3</sup>        |
| G4938   | EHEC O157:H7 ( <i>eae+</i> , <i>stx2+</i> )                | <sup>4</sup>        |
| G1334   | EHEC O157:H7 ( <i>eae+</i> , <i>stx1+</i> , <i>stx2+</i> ) | BfR                 |

|                 |                                                                                         |                  |
|-----------------|-----------------------------------------------------------------------------------------|------------------|
| G2534           | EHEC O157:H7 ( <i>eae+</i> , <i>stx1+</i> , <i>stx2+</i> )                              | BfR              |
| G4940           | EHEC O157:H- ( <i>eae+</i> , <i>stx2+</i> )                                             | 5                |
| G2537           | EHEC O157:H- ( <i>eae+</i> , <i>stx1+</i> , <i>stx2+</i> )                              | BfR              |
| G4947           | EHEC O111:H8 ( <i>eae+</i> , <i>stx1+</i> )                                             | Lab collection   |
| G4948           | EHEC O111:H8 ( <i>eae+</i> , <i>stx1+</i> , <i>stx2+</i> )                              | 6                |
| G4950           | EHEC O111:H- ( <i>eae+</i> , <i>stx1+</i> , <i>stx2+</i> )                              | Lab collection   |
| G4951           | EHEC O111:H- ( <i>eae+</i> , <i>stx1+</i> , <i>stx2+</i> )                              | 7                |
| G3105           | EHEC O111:H- ( <i>eae+</i> , <i>stx1+</i> , <i>stx2+</i> )                              | Lab collection   |
| G4955           | EHEC O26:H11 ( <i>eae+</i> , <i>stx1+</i> )                                             | 4                |
| G4956           | EHEC O26:H11 ( <i>eae+</i> , <i>stx1+</i> )                                             | 8                |
| G1344           | EHEC O26:H11 ( <i>eae+</i> , <i>stx1+</i> )                                             | BfR              |
| G4958           | EHEC O26:H- ( <i>eae+</i> , <i>stx1+</i> )                                              | 9                |
| G4959           | EHEC O26:H- ( <i>eae+</i> , <i>stx1+</i> )                                              | BfR              |
| G1327           | EHEC O103:H2 ( <i>eae+</i> , <i>stx1+</i> )                                             | BfR              |
| G1345           | EHEC O145:H28 ( <i>eae+</i> , <i>stx1+</i> , <i>stx2+</i> )                             | BfR              |
| G4963           | EHEC O70:H11 ( <i>eae+</i> , <i>stx1+</i> )                                             | 10               |
| G4944           | EPEC O55:H7 ( <i>eae+</i> )                                                             | Aus <sup>‡</sup> |
| G4945           | EPEC O55:H7 ( <i>eae+</i> )                                                             | 11               |
| G1094           | EPEC O127:H- ( <i>eae+</i> )                                                            | Aus              |
| G3109           | EPEC O127:H- ( <i>eae+</i> )                                                            | Lab collection   |
| G1474           | EPEC O86:H34 ( <i>eae+</i> )                                                            | Aus              |
| G1179           | EPEC O114:H2 ( <i>eae+</i> )                                                            | BfR              |
| G1679           | EPEC O126:H- ( <i>eae+</i> )                                                            | Aus              |
| G1095           | EPEC O128:H2 ( <i>eae+</i> )                                                            | Lab collection   |
| G1098           | EPEC O142:H6 ( <i>eae+</i> )                                                            | Aus              |
| G1485           | EPEC O145:H34 ( <i>eae+</i> )                                                           | BfR              |
| G1100           | EPEC O145:H34 ( <i>eae+</i> )                                                           | Lab collection   |
| <b>Plasmids</b> |                                                                                         |                  |
| pKD3            | Containing a chloramphenicol resistance cassette and the flipase recognition sites, CmR | 12               |
| pKD4            | Containing a kanamycin resistance cassette and the flipase recognition sites, KmR       | 12               |
| pKD46           | Red recombination plasmid, ApR                                                          | 12               |
| pCP20           | FLP expression plasmid, ApR, CmR                                                        | 12               |
| pET28a+         | T7 expression vector, KmR                                                               | Novagen          |
| pWSK29          | Expression vector, ApR                                                                  | 13               |
| pTRC99A         | Expression vector, ApR                                                                  | 14               |
| pACYC184        | Expression vector, CmR, TcR                                                             | 15               |
| pLW1629         | pACYC184 carrying <i>birA</i> from <i>Acinetobacter calcoaceticus</i> (AC), CmR         | This work        |
| pLW1693         | pWSK29 carrying <i>birA</i> , ApR                                                       | This work        |
| pLW1694         | pWSK29 carrying <i>fur</i> , ApR                                                        | This work        |
| pLW1630         | pTRC99A carrying <i>birA</i> , ApR                                                      | This work        |

|         |                                           |           |
|---------|-------------------------------------------|-----------|
| pLW1633 | pTRC99A carrying <i>fur</i> , ApR         | This work |
| pLW1631 | pET28a carrying <i>birA</i> , KmR         | This work |
| pLW1634 | pET28a carrying <i>fur</i> , KmR          | This work |
| pLW1658 | pTRC99A carrying <i>birA</i> -3xFLAG, ApR | This work |
| pLW1659 | pTRC99A carrying <i>fur</i> -3xFLAG, ApR  | This work |

\* , ATCC, American Type Culture Collection, Manassas, Virginia, USA. † , BfR, Beutin Federal institute for Risk Assessment National Reference Laboratory for *Escherichia coli*, Berlin, Germany. ‡ , Aus, School of Molecular and Microbial Biosciences, University of Sydney, Sydney, Australia.



**Supplementary Table 5. Primers used in this study (5'-3')**

| Primers for gene mutation                        |   |                                                                                                                |
|--------------------------------------------------|---|----------------------------------------------------------------------------------------------------------------|
| <i>birA</i>                                      | F | GTGCATCAGGTGAAGTGAGCGCAGTGGAGACAATTCGTGTAGGCTGGAGCTGCTTC                                                       |
| <i>birA</i>                                      | R | CGCAAATAATTTGCAGGGGAGCTAATGCTCCCTTTTCATGGGAATTAGCCATGGTCC                                                      |
| <i>fur</i>                                       | F | ATGAAGTGAACCGCTTAGTAACAGGACCAGATTCCGCGTGTAGGCTGGAGCTGCTTC                                                      |
| <i>fur</i>                                       | R | GCCAACCCGCAGGTTGGCTTTTCTCGTTCAGACTGGCATGGGAATTAGCCATGGTCC                                                      |
| <i>eae-his</i>                                   | F | TAATGTTAATACTCCAAATGTCTATGCGGTTTGTGTAGAACCACCACCACCACCA<br>CTAATAGGTGTAGGCTGGAGCTGCTTC                         |
| <i>eae-his</i>                                   | R | ACTAAAACAATACATATTTTTAGCCGGGGTGGTTATGGAAATGGGAATTAGCCATGGT<br>CC                                               |
| <i>tir-his</i>                                   | F | TTCGAATAACCCACCAGCGCCGGGATCCCATCGTTTCGTCCACCACCACCACCACCA<br>CTAATAGGTGTAGGCTGGAGCTGCTTC                       |
| <i>tir-his</i>                                   | R | CCCCCTCCCTCCCTCTAAATAAAATGATTATGGATATATATGGGAATTAGCCATGGT<br>CC                                                |
| <i>fur-3</i> ×flag                               | F | CGATTGCCGCGAAGATGAGCACGCGCACGAAGGCAAAGACTACAAAGACCATGACG<br>GTG                                                |
| <i>fur-3</i> ×flag                               | R | GCCAACCCGCAGGTTGGCTTTTCTCGTTCAGACTGGCTTACGCCCCGCCCTGCCACTC<br>A                                                |
| Primers for gene cloning                         |   |                                                                                                                |
| <i>birA</i>                                      | F | CGGGATCCATGAAGGATAACACCGTGCC                                                                                   |
| <i>birA</i>                                      | R | CCCAAGCTTTTCTTATTTTTCTGCACTACGCA                                                                               |
| <i>fur</i>                                       | F | CGGGATCCATGACTGATAACAATACCGCCCT                                                                                |
| <i>fur</i>                                       | R | CCCAAGCTTTTATTTGCCTTCGTGCGCGT                                                                                  |
| <i>birA</i> (AC)                                 | F | CCCAAGCTTGCTAAATTACGAAAAACAGGC                                                                                 |
| <i>birA</i> (AC)                                 | R | CGGGATCCGTGTTTCCGATATCAAGCCA                                                                                   |
| Primers for BirA-3×FLAG and Fur-3×FLAG (plasmid) |   |                                                                                                                |
| <i>birA</i>                                      | F | CATGCCATGGTCATGAAGGATAACACCGTGC                                                                                |
| <i>birA</i>                                      | R | CGGAATTCCTTACTATTTATCGTCGTCATCTTTGTAGTCGATATCATGATCTTTATAATC<br>ACCGTCATGGTCTTTGTAGTCTTTTCTGCACTACGCAGGGATAT   |
| <i>fur</i>                                       | F | CATGCCATGGGCATGACTGATAACAATACCG                                                                                |
| <i>fur</i>                                       | R | CGGAATTCCTTACTATTTATCGTCGTCATCTTTGTAGTCGATATCATGATCTTTATAATC<br>ACCGTCATGGTCTTTGTAGTCTTTGCCTTCGTGCGCGTGCTCATCT |
| Primers for qRT-PCR                              |   |                                                                                                                |
| <i>rrsH</i>                                      | F | GAAAGCGTGGGGAGCAAAC                                                                                            |
| <i>rrsH</i>                                      | R | ACATGCTCCACCGCTTGTG                                                                                            |
| <i>ler</i>                                       | F | CAGGAAGCAAAGCGACTG                                                                                             |
| <i>ler</i>                                       | R | ACCAGGTCTGCCCTTCTT                                                                                             |
| <i>eae</i>                                       | F | GACGGTAGTTCCTGGACTTCTT                                                                                         |
| <i>eae</i>                                       | R | TCGCCACCAATACCTAAACG                                                                                           |
| <i>escC</i>                                      | F | GACCAAAAATGTTGTCGTCCCA                                                                                         |
| <i>escC</i>                                      | R | AGGTTACCGCTTCGCTCG                                                                                             |
| <i>escN</i>                                      | F | AGGTTTTCTTGTTGCCTTTTGA                                                                                         |

|             |   |                          |
|-------------|---|--------------------------|
| <i>escN</i> | R | TCTCCATTGGTCTGCCTATGC    |
| <i>escT</i> | F | GCAATAGATGCGGCTGGAC      |
| <i>escT</i> | R | TCGGCTTGTAATGGTAATATCTCG |
| <i>tir</i>  | F | GATGTTCTGGACTTCCTGTAA    |
| <i>tir</i>  | R | CAACAGAGGTCTCAACACCATT   |
| <i>espB</i> | F | AAAACCTCTCGCAAGATGG      |
| <i>espB</i> | R | AATAATCCCGCCAACCAAAG     |
| <i>bioA</i> | F | GGATGGTGAATGGGATGAGC     |
| <i>bioA</i> | R | TCTCGTCGGCAATCAGCAA      |
| <i>bioB</i> | F | GGAAGAATCCCCACGAACG      |
| <i>bioB</i> | R | CCTAAACCCACAATGCCACC     |
| <i>bioC</i> | F | AACATCGTATTCAGCCCATCAC   |
| <i>bioC</i> | R | TCACGAACAATCACTCCCAAA    |
| <i>bioD</i> | F | AACGGATACCGAAGTGGG       |
| <i>bioD</i> | R | TGTTGTATCGCCTGTGCC       |
| <i>bioF</i> | F | CGCCATCTTATCTACAGCACCA   |
| <i>bioF</i> | R | GCAGCACCTCCAACAGACG      |
| <i>birA</i> | F | ATGGCGGTAGTGTAAGTGTGCT   |
| <i>birA</i> | R | TCCAGACGCCAGAATCG        |
| <i>accA</i> | F | GCCATCCACAGCGTCCTT       |
| <i>accA</i> | R | TTCTTTGGTTTCACGACCTTTT   |
| <i>accB</i> | F | AAGAATCAGGCATCTCCGAAC    |
| <i>accB</i> | R | CGTTGACTTTCTGACCCACTTC   |
| <i>accC</i> | F | TTGCGTATTCTTCGTGCCTG     |
| <i>accC</i> | R | AGCGTTCAACCTGCTCGG       |
| <i>accD</i> | F | AAAAGCAACATTACTCCCACCC   |
| <i>accD</i> | R | GGCTCAAGCTCGCTACCCA      |
| <i>fur</i>  | F | GTATCGTCACCCGCCACAA      |
| <i>fur</i>  | R | CGCAGTGACCGTAAAGATAGAGA  |
| Z4332       | F | GCATCAGAAGCCCGACTACG     |
| Z4332       | R | CATTTGCCAGACCAAGGAGC     |
| Z4971       | F | GAGATCGTGGATTACCTTGC     |
| Z4971       | R | CGCCCGCTTCAGTGCTAA       |
| Z5225       | F | TACAGCCTTTAGTGCGTCG      |
| Z5225       | R | TACCAGCGGCAGCATCG        |
| Z2200       | F | GCAGCCGAGGGTGATGAA       |
| Z2200       | R | GCCAGGCGAGAAGAACGA       |
| Z2203       | F | AGAGGCAGACGGCAGTATTCA    |
| Z2203       | R | GTCCAGTTTCTTCCAGTCCAT    |
| Z2053       | F | TCTGCTCTGGCTATCATTCTGG   |
| Z2053       | R | CAGGTCTGGTCAGGTCGTCAA    |
| <i>flhD</i> | F | TAAATGAAGAAATGGCGACAACA  |
| <i>flhD</i> | R | AGATCGTCAACGCGGGAAT      |

|                         |   |                         |
|-------------------------|---|-------------------------|
| <i>flhC</i>             | F | AGTGCCCGCAAGCAGAAG      |
| <i>flhC</i>             | R | TGGTGAGCGTGGGTAATAAAAAT |
| <i>fliC</i>             | F | TGCGAACGGTGTGACGATG     |
| <i>fliC</i>             | R | GCCGCATCACCAGCAGAATA    |
| <i>flgM</i>             | F | GTATTGATCGCACTTCGCCTCT  |
| <i>flgM</i>             | R | ATATCACTGCTGCCGGGTTG    |
| Primers for EMSAs       |   |                         |
| <i>P<sub>fur</sub></i>  | F | CTTTCTTTAGGGCGGTATTG    |
| <i>P<sub>fur</sub></i>  | R | TCAATGCCTGATGTGATGC     |
| <i>bioO</i>             | F | GCCCACCAGGACGACATA      |
| <i>bioO</i>             | R | GCTTTGCGGGCAGTATTT      |
| Box1                    | F | GAAGAACTCGCACTCACA      |
| Box1                    | R | AACAGAAGACTGGTTGCT      |
| Box2                    | F | TAGTCGATAAACGGCTGAAC    |
| Box2                    | R | TCCTGGTGTATAGCATGGC     |
| Box3                    | F | GGATAATCAGTCCACCCAGG    |
| Box3                    | R | TCCCGTATAGCGAAAGCC      |
| Box4                    | F | CGATTTTGAAACTACTGGG     |
| Box4                    | R | GTTGGCGGCATCATTGT       |
| Box5                    | F | TTGGCAGTAATGATAACAGAAA  |
| Box5                    | R | GACATTAACTTGATCCTGGC    |
| Box6                    | F | GAGTCCATCATCAGGCACAT    |
| Box6                    | R | TTTAAGGTGGTTGTTTGATGAA  |
| <i>P<sub>jepA</sub></i> | F | TGTTTTATTCTGCATTTTTG    |
| <i>P<sub>jepA</sub></i> | R | TTCGTCATTCAGACGCTGC     |
| <i>rpoS</i>             | F | CTTCCAGTGTTGCCGCT       |
| <i>rpoS</i>             | R | CCCGTACTATTGTTTGCC      |
| Primers for ChIP-qPCR   |   |                         |
| Site5                   | F | TGTATTGGCGTTGCTGTCCG    |
| Site5                   | R | GGCTTTAGTTCGCTGTGGGT    |
| Site10                  | F | GCCACGCCTAAATGAAAACC    |
| Site10                  | R | CGAAATTCTCAATGCCCTGATGT |
| Site12                  | F | AAAATTAGCTCGCAACCTTCG   |
| Site12                  | R | TGGGGCTTCTCCAAAACG      |
| Site16                  | F | GGCAAGATCCAGCTCCGTC     |
| Site16                  | R | CGTGCGTGTATTTGGTCAGGT   |
| Site33                  | F | GGATGTCAGCCGCCGTAT      |
| Site33                  | R | ATTACTTGCTTGCCAGACGC    |
| Site39                  | F | TGTGGTCAGGGCTGGAAAA     |
| Site39                  | R | GGTGAGGGAACCCAATACGT    |
| Site40                  | F | TTTTCCCGCACACGCTA       |
| Site40                  | R | GCAGGCCATGCACCAGAG      |
| Site44                  | F | GAAACTGACGCTGACCTACGC   |

|                           |   |                            |
|---------------------------|---|----------------------------|
| Site44                    | R | GACGATAGTGCCTTCACCAAAC     |
| Site45                    | F | ACGATGCCGAAATGCTGTC        |
| Site45                    | R | CGCAAGGTACTCGCCATAAAA      |
| <i>rpoS</i>               | F | GTTATCGCAGGGAGCCACA        |
| <i>rpoS</i>               | R | TTTTACCACCAGACGCAAGTTA     |
| Box1                      | F | CGAAGAACTCGCACTCACATTA     |
| Box1                      | R | AACAGAAGACTGGTTGCTGGAG     |
| Box2                      | F | CACGTAGTCGATAAACGGCTGA     |
| Box2                      | R | TTAATTGGTTTTCTTTGGCTGTG    |
| Box3                      | F | TAATCAGTCCACCCAGGTACGA     |
| Box3                      | R | GGTGCCAAGAGTTATTCCCGTA     |
| Box4                      | F | CACGATTTTGAAACTACTGGG      |
| Box4                      | R | TGTTGGCGGCATCATTGTA        |
| Box5                      | F | GCTGTGAGCCAATGGTCATT       |
| Box5                      | R | CATTAAACTTGATCCTGGCGAG     |
| Box6                      | F | CGCAGTCGCTTTGCTTCC         |
| Box6                      | R | GGTCCTTCCTGATAAGGTCGC      |
| <i>P<sub>hms</sub></i>    | F | AGCATTTCTTCCAGCGTTCA       |
| <i>P<sub>hms</sub></i>    | R | GCGGCACAAAATAAAGAACAAT     |
| <i>P<sub>fepA</sub></i>   | F | CATCAACACGACGCATCCC        |
| <i>P<sub>fepA</sub></i>   | R | GACCTCAAACATTTTCGTCATTCA   |
| <i>P<sub>fis</sub></i>    | F | TGGTATCTCCAGGAACACGCT      |
| <i>P<sub>fis</sub></i>    | R | TTAACCGAGTCACGCAGGG        |
| <i>P<sub>ihfA</sub></i>   | F | CATTTGGCGACGGTAGCG         |
| <i>P<sub>ihfA</sub></i>   | R | GTAAGGGTGTTCGCGAGGG        |
| <i>P<sub>ihfB</sub></i>   | F | GGTTTCGTCTGTAAATCAAGCA     |
| <i>P<sub>ihfB</sub></i>   | R | TGGGTGGCAAGTCTTTCTATCA     |
| <i>P<sub>grlR/A</sub></i> | F | AAGCAATATCAAGAATAATGGAGACC |
| <i>P<sub>grlR/A</sub></i> | R | AAAACAATCGGAAGCATAACAGTAA  |
| <i>P<sub>grvA</sub></i>   | F | TTACTCAGAAAATAAAGGCAAGAACA |
| <i>P<sub>grvA</sub></i>   | R | CCTATAACGGGGATACGCAGTT     |
| <i>P<sub>qseA</sub></i>   | F | GAGCAGGCGTTATTATTTTCAGC    |
| <i>P<sub>qseA</sub></i>   | R | GCGTTTTAGTCGTTCCATTATTCA   |
| <i>P<sub>hha</sub></i>    | F | CCTGACTTCCGCCATTTCTG       |
| <i>P<sub>hha</sub></i>    | R | TGAGCATATTGCGACCTTCG       |
| <i>P<sub>gadE</sub></i>   | F | TATGGAGTGCGTGATGGATAAAT    |
| <i>P<sub>gadE</sub></i>   | R | ACTGCCAAAAGCCCTGTAAAA      |
| <i>P<sub>hfq</sub></i>    | F | TACAGGTTGTTGGTGCTATCGC     |
| <i>P<sub>hfq</sub></i>    | R | GATTGCCCTTAGCCATTCTC       |
| <i>P<sub>etrA</sub></i>   | F | CTATTCCCTCAACGTTAAGCAAAT   |
| <i>P<sub>etrA</sub></i>   | R | GTGAAGTAGACATCACTGGAAAAGAC |
| <i>P<sub>eivF</sub></i>   | F | TTTCCCCGTAAGAACCACATTT     |
| <i>P<sub>eivF</sub></i>   | R | TGGACAGGATGACGTACTAGTGTAAG |

|                                       |   |                          |
|---------------------------------------|---|--------------------------|
| <i>P<sub>rpoS</sub></i>               | F | CAGAAATGTTGGCAAGAATGGA   |
| <i>P<sub>rpoS</sub></i>               | R | GGTATCGCCGCAGCAAGTAT     |
| <i>P<sub>rpoN</sub></i>               | F | AAACGCATCATTGAGCACCTG    |
| <i>P<sub>rpoN</sub></i>               | R | ACGTCGCAAACCTTCTACCCTATC |
| Primers for EHEC/ EPEC identification |   |                          |
| <i>mdh</i>                            | F | AGGCGCTTGCACTACTGTTA     |
| <i>mdh</i>                            | R | AGCGCGTCTGTTCAAAATG      |
| <i>eae</i>                            | F | ATTATGGAACGGCAGAGGTTAAT  |
| <i>eae</i>                            | R | ATCCCCATCGTCACCAGAGG     |
| <i>stx1A</i>                          | F | CATTCGCTCTGCAATAGGTA     |
| <i>stx1A</i>                          | R | AACTCGCGATGCATGATGA      |
| <i>stx2A</i>                          | F | TATCTGGCGTTAATGGAGTT     |
| <i>stx2A</i>                          | R | CCTGTCGCCAGTTATCTGAC     |

## Supplementary References

1. de Lorenzo, V., Wee, S., Herrero, M. & Neilands, J. B. Operator sequences of the aerobactin operon of plasmid ColV-K30 binding the ferric uptake regulation (*fur*) repressor. *J Bacteriol.* **169**, 2624-2630 (1987).
2. Escolar, L., Perez-Martin, J. & de Lorenzo, V. Binding of the *fur* (ferric uptake regulator) repressor of *Escherichia coli* to arrays of the GATAAT sequence. *J Mol Biol.* **283**, 537-547 (1998).
3. Kurioka, T., Yunou, Y. & Kita, E. Enhancement of susceptibility to Shiga toxin-producing *Escherichia coli* O157:H7 by protein calorie malnutrition in mice. *Infect Immun.* **66**, 1726-1734 (1998).
4. Gansheroff, L. J., Wachtel, M. R. & O'Brien, A. D. Decreased adherence of enterohemorrhagic *Escherichia coli* to HEp-2 cells in the presence of antibodies that recognize the C-terminal region of intimin. *Infect Immun.* **67**, 6409-6417 (1999).
5. Bielaszewska, M., *et al.* Isolation and characterization of sorbitol-fermenting Shiga toxin (Verocytotoxin)-producing *Escherichia coli* O157:H- strains in the Czech Republic. *J Clin Microbiol.* **36**, 2135-2137 (1998).
6. Bopp, C. A., Greene, K. D., Downes, F. P., Sowers, E. G., Wells, J. G. & Wachsmuth, I. K. Unusual verotoxin-producing *Escherichia coli* associated with hemorrhagic colitis. *J Clin Microbiol.* **25**, 1486-1489 (1987).
7. Russmann, H., *et al.* Genotyping of Shiga-like toxin genes in non-O157 *Escherichia coli* strains associated with haemolytic uraemic syndrome. *J Med Microbiol.* **42**, 404-410 (1995).
8. Reid, S. D., Betting, D. J. & Whittam, T. S. Molecular detection and identification of intimin alleles in pathogenic *Escherichia coli* by multiplex PCR. *J Clin Microbiol.* **37**, 2719-2722 (1999).
9. Reid, S. D., Herbelin, C. J., Bumbaugh, A. C., Selander, R. K. & Whittam, T. S. Parallel evolution of virulence in pathogenic *Escherichia coli*. *Nature.* **406**, 64-67 (2000).
10. Toma, C., Higa, N., Iyoda, S., Rivas, M. & Iwanaga, M. The long polar fimbriae genes identified in Shiga toxin-producing *Escherichia coli* are present in other diarrheagenic *E. coli* and in the standard *E. coli* collection of reference (ECOR) strains. *Res Microbiol.* **157**, 153-161

(2006).

11. Escobar-Paramo, P., Clermont, O., Blanc-Potard, A. B., Bui, H., Le Bouguenec, C. & Denamur, E. A specific genetic background is required for acquisition and expression of virulence factors in *Escherichia coli*. *Mol Biol Evol.* **21**, 1085-1094 (2004).
12. Datsenko, K. A. & Wanner, B. L. One-step inactivation of chromosomal genes in *Escherichia coli* K-12 using PCR products. *Proc Natl Acad Sci U S A.* **97**, 6640-6645 (2000).
13. Wang, R. F. & Kushner, S. R. Construction of versatile low-copy-number vectors for cloning, sequencing and gene expression in *Escherichia coli*. *Gene.* **100**, 195-199 (1991).
14. Amann, E., Ochs, B. & Abel, K. J. Tightly regulated tac promoter vectors useful for the expression of unfused and fused proteins in *Escherichia coli*. *Gene.* **69**, 301-315 (1988).
15. Chang, A. C. & Cohen, S. N. Construction and characterization of amplifiable multicopy DNA cloning vehicles derived from the P15A cryptic miniplasmid. *J Bacteriol.* **134**, 1141-1156 (1978).
